# Supplementary material for: A scalable synthesis of 2D laminate Li3VO4/C for robust pseudocapacitive Li-ion storage
Source: Royal Society of Chemistry journal article supplement (doi:10.1039/d0ta07484e), 2020-01-01
Supplement: d0ta07484e1.pdf [file d0ta07484e1.pdf]

## Scalable synthesis of 2D laminate $\text{Li}_3\text{VO}_4/\text{C}$ for robust pseudocapacitive Li-ion storage

Shuyue Yang<sup>a</sup>, Dongmei Zhang<sup>a</sup>, Zhen Xu<sup>a</sup>, Jie Xu<sup>a</sup>, Junlin Lu<sup>a</sup>, Jia Cao<sup>a</sup>, Shibing Ni<sup>a\*</sup>

<sup>a</sup> College of Materials and Chemical Engineering, Hubei Provincial Collaborative Innovation Center for New Energy Microgrid, Key Laboratory of Inorganic Nonmetallic Crystalline and Energy Conversion Materials, China Three Gorges University, Yichang, 443002, China.

Corresponding author. Tel:86 717 6397502/13972590756

E-mail: shibingni07@126.com;

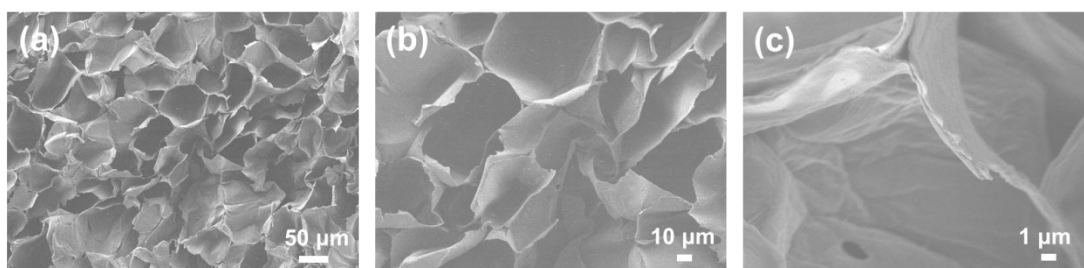

Figure S1 SEM images of Toon tree fruit with different magnification.

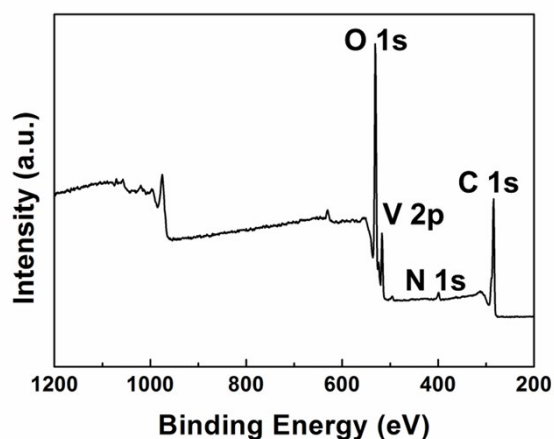

Figure S2 Survey XPS spectrum of the 2D laminate  $\text{Li}_3\text{VO}_4/\text{C}$ .

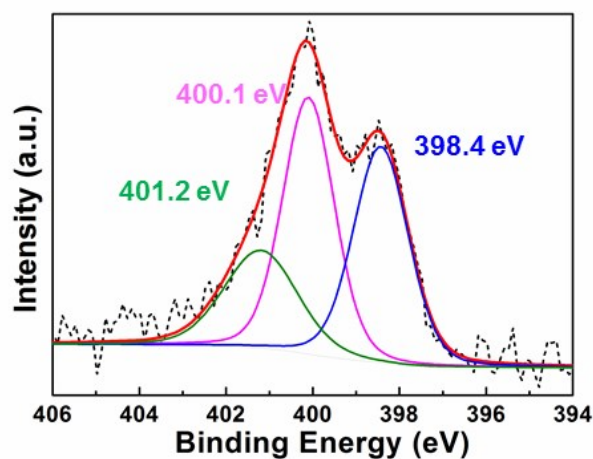

Figure S3 High resolution XPS spectrum of N 1s for the 2D laminate  $\text{Li}_3\text{VO}_4/\text{C}$ .

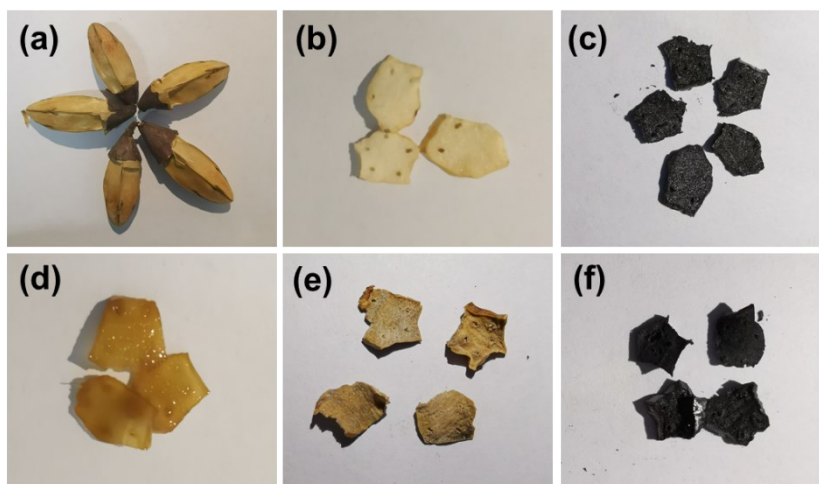

Figure S4 Optical photos of toon tree fruit and derived products. (a) natural toon tree fruit, (b) toon tree fruit slices, (c) carbon derived from toon tree fruit. (d) soaked toon tree fruit slices, (e) soaked toon tree fruit slices after drying, and (f) soaked toon tree fruit slices after sintering.

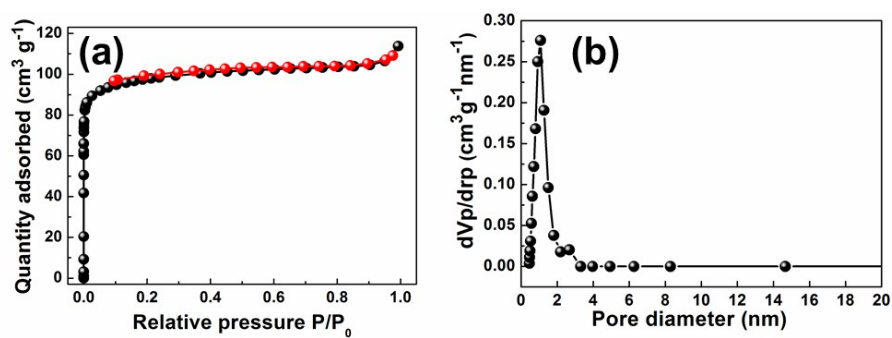

Figure S5 BET results and pore size distribution of C nanosheets derived from toon tree fruit.

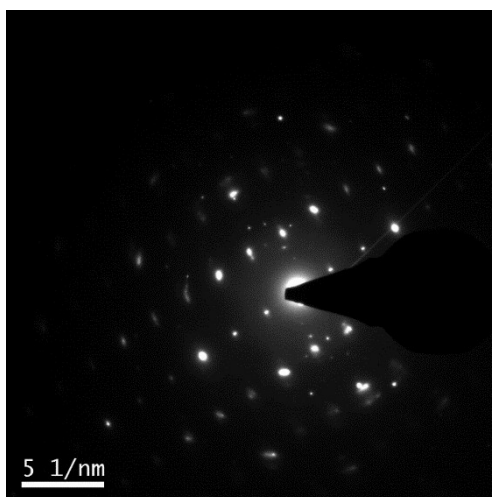

Figure S6 SAED pattern of pristine  $\text{Li}_3\text{VO}_4$  obtained in the same condition.

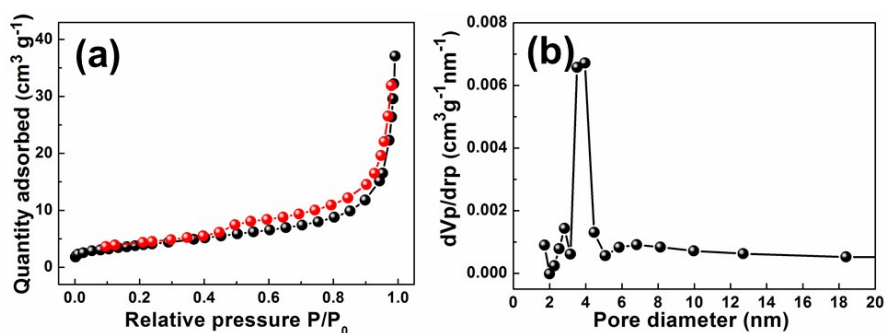

Figure S7 BET results and pore size distribution of the 2D laminate  $\text{Li}_3\text{VO}_4/\text{C}$ .

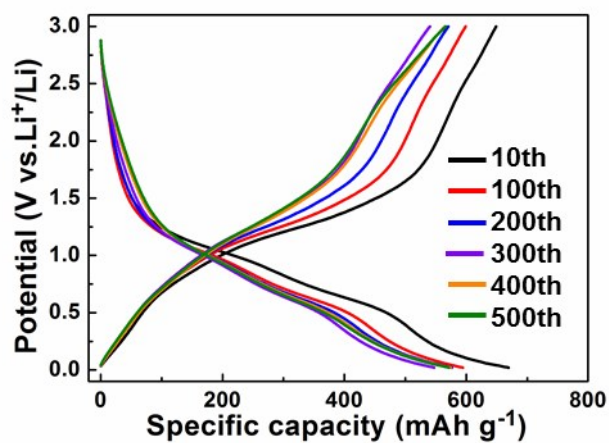

Figure S8 Representative charge/discharge curves of the 2D laminate  $\text{Li}_3\text{VO}_4/\text{C}$ .
